# Supplementary material for: Dietary Patterns, n-3 Fatty Acids Intake from Seafood and High Levels of Anxiety Symptoms during Pregnancy: Findings from the Avon Longitudinal Study of Parents and Children
Source: PubMed Central journal article supplement (PMC3710017; doi:10.1371/journal.pone.0067671), 2013-07-12
Supplement: pone.0067671.s001.pdf [file pone.0067671.s001.pdf]

**Table S1.** Frequency distribution of main investigated variables between those who were included in the analyses and those who not. ALSPAC cohort study (1991-1992)

| Variable                | Included in the analyses |      | Excluded by missing information |      | <i>P</i> value <sup>1</sup> |
|-------------------------|--------------------------|------|---------------------------------|------|-----------------------------|
|                         | <i>n</i>                 | %    | <i>n</i>                        | %    |                             |
| Age                     |                          |      |                                 |      |                             |
| <25                     | 2078                     | 21.8 | 1202                            | 33.5 | <0.001                      |
| ≥25                     | 7452                     | 78.2 | 2385                            | 66.5 |                             |
| Ethnicity               |                          |      |                                 |      |                             |
| White                   | 9344                     | 98.0 | 2416                            | 95.0 | <0.001                      |
| Non-white               | 186                      | 2.0  | 128                             | 5.0  |                             |
| Education               |                          |      |                                 |      |                             |
| Low                     | 2552                     | 26.8 | 1104                            | 41.9 | <0.001                      |
| Medium                  | 3437                     | 36.1 | 774                             | 29.4 |                             |
| High                    | 3541                     | 37.2 | 757                             | 28.7 |                             |
| Work status             |                          |      |                                 |      |                             |
| Employed                | 5936                     | 62.3 | 1032                            | 47.1 | <0.001                      |
| Unemployed              | 3594                     | 37.7 | 1159                            | 52.9 |                             |
| Housing tenure          |                          |      |                                 |      |                             |
| Mortgaged/owned         | 7463                     | 78.3 | 2143                            | 59.9 | <0.001                      |
| Council                 | 1100                     | 11.5 | 784                             | 21.9 |                             |
| Other                   | 967                      | 10.1 | 649                             | 18.1 |                             |
| Crowding (persons/room) |                          |      |                                 |      |                             |
| ≤1                      | 9029                     | 94.7 | 2957                            | 88.4 | <0.001                      |
| >1                      | 501                      | 5.3  | 388                             | 11.6 |                             |

| <i>Cont.</i>                      |                 |      |                     |      |                             |
|-----------------------------------|-----------------|------|---------------------|------|-----------------------------|
| Variable                          | Included in the |      | Excluded by missing |      | <i>P</i> value <sup>†</sup> |
|                                   | analyses        |      | information         |      |                             |
|                                   | <i>n</i>        | %    | <i>n</i>            | %    |                             |
| Parity                            |                 |      |                     |      |                             |
| 0                                 | 4294            | 45.1 | 1431                | 44.6 |                             |
| 1                                 | 3395            | 35.6 | 1037                | 32.4 | <0.001                      |
| ≥2                                | 1841            | 19.3 | 737                 | 23.0 |                             |
| Previous history of abortion      |                 |      |                     |      |                             |
| Yes                               | 1268            | 13.3 | 592                 | 18.4 | <0.001                      |
| No                                | 8262            | 86.7 | 2631                | 81.6 |                             |
| Previous history of miscarriage   |                 |      |                     |      |                             |
| Yes                               | 1932            | 20.3 | 811                 | 24.8 | <0.001                      |
| No                                | 7598            | 79.7 | 2456                | 75.2 |                             |
| Smoking                           |                 |      |                     |      |                             |
| Yes                               | 2129            | 22.3 | 1116                | 32.5 | <0.001                      |
| No                                | 7401            | 77.7 | 2318                | 67.5 |                             |
| Alcohol consumption               |                 |      |                     |      |                             |
| Yes                               | 5281            | 55.4 | 1716                | 52.4 | <0.001                      |
| No                                | 4249            | 44.6 | 1561                | 47.6 |                             |
| Childhood life events (decile)    |                 |      |                     |      |                             |
| 1 <sup>st</sup> - 9 <sup>th</sup> | 8318            | 87.3 | 1895                | 82.9 | <0.001                      |
| 10 <sup>th</sup>                  | 1212            | 12.7 | 392                 | 17.1 |                             |
| Recent life events (decile)       |                 |      |                     |      |                             |
| 1 <sup>st</sup> - 9 <sup>th</sup> | 8480            | 89.0 | 2232                | 86.3 | <0.001                      |
| 10 <sup>th</sup>                  | 1050            | 11.0 | 354                 | 13.7 |                             |
| Family adversity index (decile)   |                 |      |                     |      |                             |
| 1 <sup>st</sup> - 9 <sup>th</sup> | 8928            | 93.7 | 3096                | 90.4 | <0.001                      |
| 10 <sup>th</sup>                  | 602             | 6.3  | 330                 | 9.6  |                             |

<sup>†</sup>*P* value refers to chi-square test for comparisons of sample distribution of investigated variables.
